# Supplementary material
Source: PubMed Central journal article supplement (PMC9343883)
Supplement: sj-pdf-1-brn-10.1177_10998004221085029.pdf [file sj-pdf-1-brn-10.1177_10998004221085029.pdf]

Supplemental Table 1. Bivariate associations of physical activity (average steps per day) with potential confounding variables by timepoint

|                 |           | Pre-camp (time 1)     |              |         | During camp (time 2)  |               |             |         |
|-----------------|-----------|-----------------------|--------------|---------|-----------------------|---------------|-------------|---------|
|                 |           | Average steps per day |              |         | Average steps per day |               |             |         |
|                 |           | Low (n=27)            | Medium (n=5) | P value | Low (n=1)             | Medium (n=12) | High (n=19) | P value |
| Gender          | Male      | 13                    | 4            | 0.19    | 0                     | 3             | 14          | 0.02    |
|                 | Female    | 14                    | 1            |         | 1                     | 9             | 5           |         |
| Race            | White     | 19                    | 2            | 0.19    | 1                     | 8             | 12          | 0.75    |
|                 | non-White | 8                     | 3            |         | 0                     | 4             | 7           |         |
| Treatment       | On        | 4                     | 1            | 0.77    | 0                     | 3             | 2           | 0.51    |
|                 | Off       | 23                    | 4            |         | 1                     | 9             | 17          |         |
| Age in years    | Avg (SD)  | 13.3 (2.6)            | 12.6 (2.9)   | 0.57    | *                     | 13.0 (2.6)    | 13.4 (2.7)  | 0.70    |
| Body mass index | Avg (SD)  | 24.1 (6.2)            | 20.1 (3.7)   | 0.18    | *                     | 22.3 (6.6)    | 24.2 (5.7)  | 0.39    |

\*For analytical reasons the lone subject in the Low steps category was included in the Medium steps category

Supplemental Table 2. Bivariate associations of fatigue with potential confounding variables by timepoint

|                 |           | Pre-camp (time 1) |             |         | During camp (time 2) |            |         |
|-----------------|-----------|-------------------|-------------|---------|----------------------|------------|---------|
|                 |           | Fatigue           |             |         | Fatigue              |            |         |
|                 |           | Low (n=21)        | High (n=11) | P value | Low (n=24)           | High (n=8) | P value |
| Gender          | Male      | 11                | 6           | 0.91    | 11                   | 6          | 0.15    |
|                 | Female    | 10                | 5           |         | 13                   | 2          |         |
| Race            | White     | 12                | 9           | 0.16    | 15                   | 6          | 0.52    |
|                 | non-White | 9                 | 2           |         | 9                    | 2          |         |
| Treatment       | On        | 2                 | 3           | 0.19    | 4                    | 1          | 0.78    |
|                 | Off       | 19                | 8           |         | 30                   | 7          |         |
| Age in years    | Avg (SD)  | 13.4 (2.5)        | 12.8 (2.9)  | 0.54    | 13.4 (2.4)           | 12.8 (3.2) | 0.56    |
| Body mass index | Avg (SD)  | 23.0 (5.0)        | 24.4 (7.9)  | 0.53    | 23.7 (5.7)           | 22.7 (7.5) | 0.69    |

Supplemental Table 3. Metabolomic associations with Physical Activity stratified by Sex (Boys)

| Metabolic Pathway                           | Total metabolites | Hits | P value | FDR  |
|---------------------------------------------|-------------------|------|---------|------|
| Glycine, serine and threonine metabolism    | 33                | 3    | 0.009   | 0.40 |
| Cysteine and methionine metabolism          | 33                | 3    | 0.009   | 0.40 |
| Pyruvate metabolism                         | 22                | 2    | 0.04    | 0.93 |
| Glycolysis / Gluconeogenesis                | 26                | 2    | 0.05    | 0.93 |
| Alanine, aspartate and glutamate metabolism | 28                | 2    | 0.06    | 0.93 |
| Arginine and proline metabolism             | 38                | 2    | 0.09    | 1    |

The Kyoto Encyclopedia of Genes and Genomes defined the metabolic pathways and metabolite library

Supplemental Table 4. Metabolomic associations with Physical Activity stratified by Sex (Girls)

| Metabolic Pathway                           | Total metabolites | Hits | P value | FDR  |
|---------------------------------------------|-------------------|------|---------|------|
| Glycine, serine and threonine metabolism    | 33                | 3    | 0.003   | 0.24 |
| Pentose phosphate pathway                   | 22                | 2    | 0.02    | 0.68 |
| Galactose metabolism                        | 27                | 2    | 0.02    | 0.68 |
| Glyoxylate and dicarboxylate metabolism     | 32                | 2    | 0.03    | 0.70 |
| Amino sugar and nucleotide sugar metabolism | 37                | 2    | 0.04    | 0.73 |
| Fatty acid biosynthesis                     | 47                | 2    | 0.07    | 0.75 |
| Aminoacyl-tRNA biosynthesis                 | 48                | 2    | 0.07    | 0.75 |
| Purine metabolism                           | 65                | 2    | 0.12    | 1.00 |

The Kyoto Encyclopedia of Genes and Genomes defined the metabolic pathways and metabolite library

Supplemental Table 5. Metabolomic associations with Physical Activity stratified by Treatment Status (off therapy)

| Metabolic Pathway                        | Total metabolites | Hits | P value | FDR   |
|------------------------------------------|-------------------|------|---------|-------|
| Galactose metabolism                     | 27                | 3    | 0.00613 | 0.454 |
| Glycine, serine and threonine metabolism | 33                | 3    | 0.0108  | 0.454 |
| Pentose phosphate pathway                | 22                | 2    | 0.0387  | 1     |
| Purine metabolism                        | 65                | 3    | 0.0641  | 1     |
| Aminoacyl-tRNA biosynthesis              | 48                | 2    | 0.151   | 1     |

The Kyoto Encyclopedia of Genes and Genomes defined the metabolic pathways and metabolite library
